# Supplementary material for: A Bacillus anthracis Genome Sequence from the Sverdlovsk 1979 Autopsy Specimens
Source: PubMed Central journal article supplement (PMC5050339; doi:10.1128/mbio.01501-16), 2016-09-27

Percentage

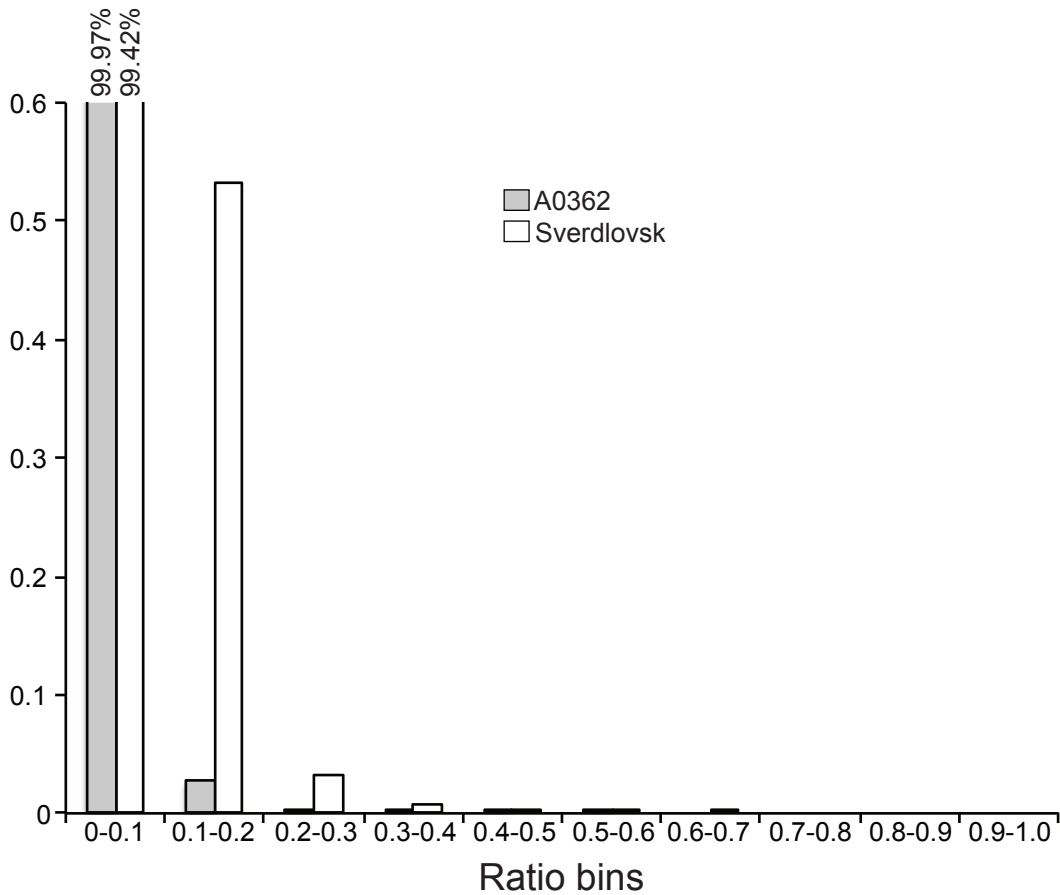

Supplement: mbo005163008sf1.pdf [file mbo005163008sf1.pdf]
