# Supplementary material for: A Bacillus anthracis Genome Sequence from the Sverdlovsk 1979 Autopsy Specimens
Source: PubMed Central journal article supplement (PMC5050339; doi:10.1128/mbio.01501-16), 2016-09-27

A

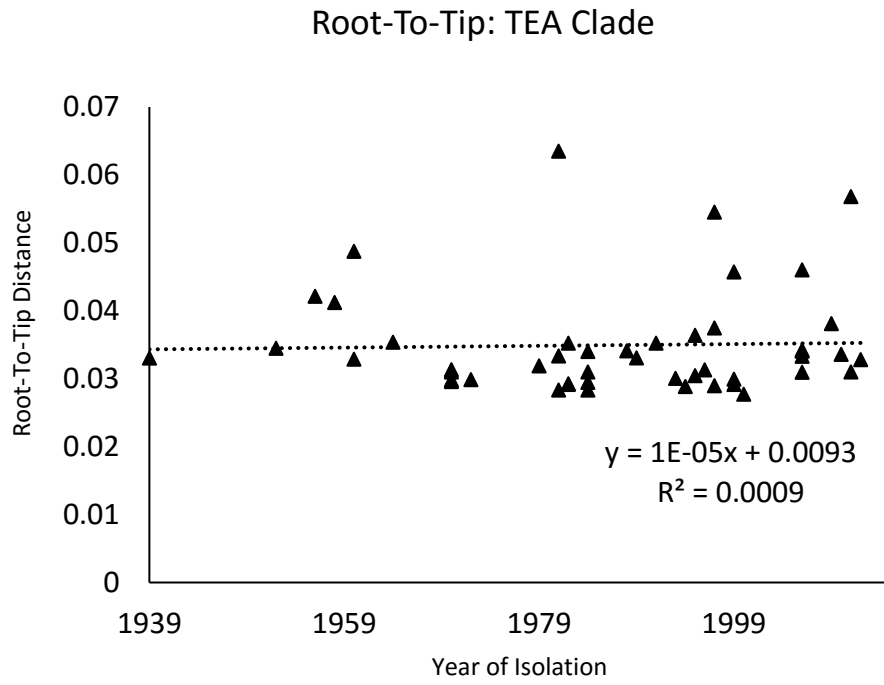

B

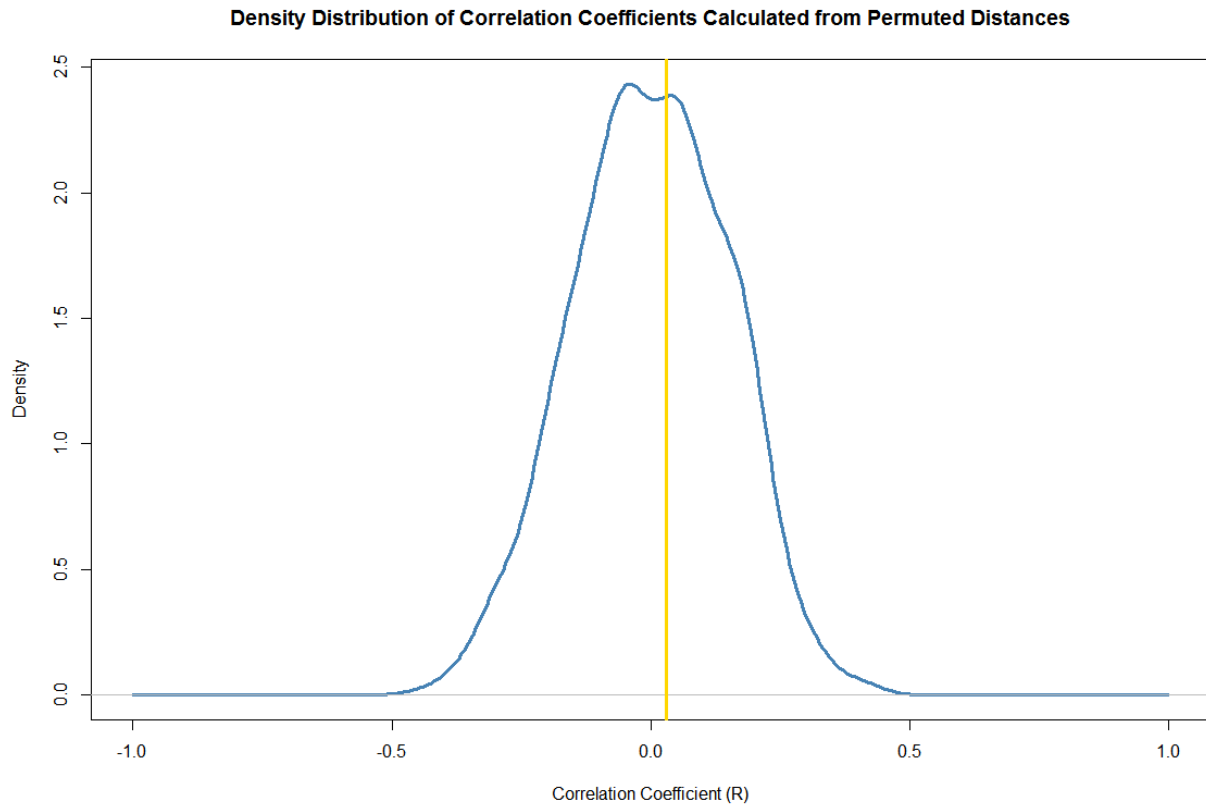

Supplement: mbo005163008sf5.pdf [file mbo005163008sf5.pdf]
